# Supplementary material for: Enid Blyton: el regreso de la madre de "Los cinco"
Source: MDPI journal article supplement (doi:10.3390/membranes12100940), 2006-01-01
Supplement: s1 [file s1]

# **Fabrication of thin film composite membranes on nano-zeolite modified support layer for tailored nanofiltration performance.**

Shabin Mohammed<sup>1</sup>, Haya Nassrullah<sup>1,2</sup>, Jamaliah Aburabie<sup>1</sup>, Raed Hashaikeh<sup>1</sup>, \*

<sup>1</sup> NYUAD Water Research Center, Department of Engineering, New York University Abu Dhabi, Abu Dhabi P.O. Box 129188, United Arab Emirates

<sup>2</sup> Chemical and Biomolecular Engineering Division, New York University, Tandon School of Engineering, NY, 11201, USA

Corresponding author email address: [raed.hashaikeh@nyu.edu](mailto:raed.hashaikeh@nyu.edu)

## **SUPPLEMENTARY DATA**

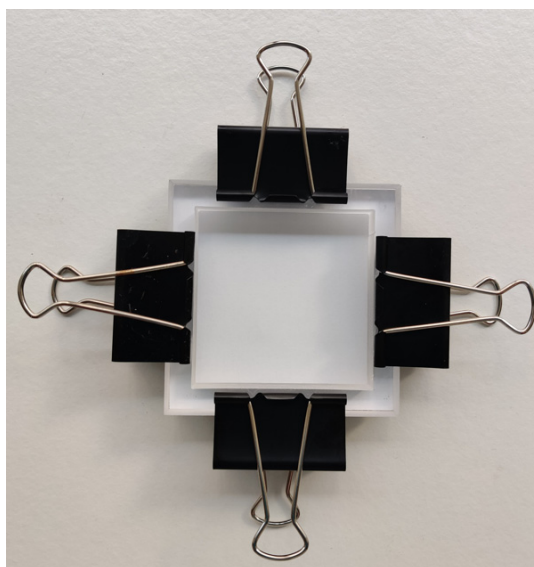

**Figure S1:** Custom-made plate and frame set-up for membrane fabrication through interfacial polymerization.

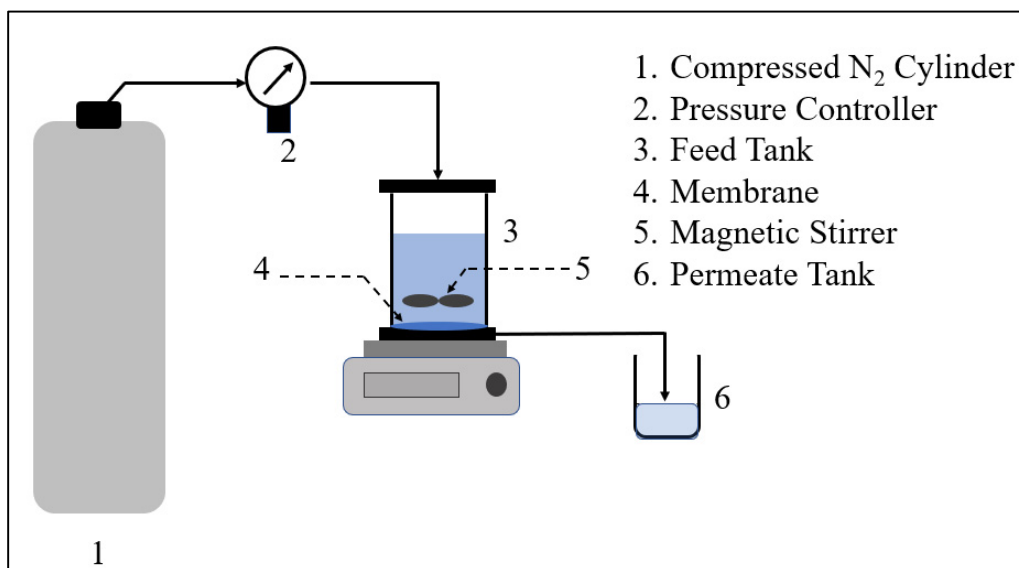

**Figure S2:** Schematic illustration of dead-end filtration system used for characterizing permeance of membrane supports and nanofiltration performance of PA membranes.

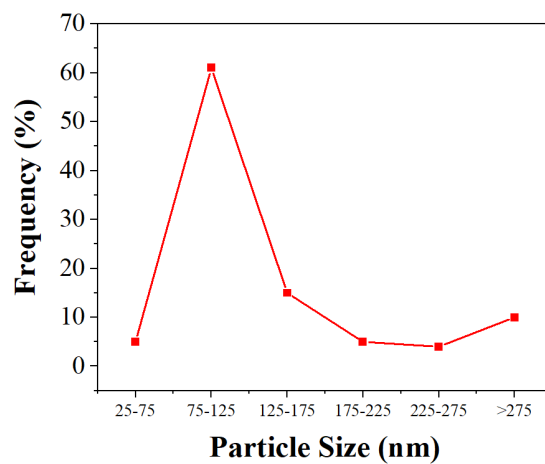

**Figure S3:** Particle size distribution of nanozeolites obtained after ball milling.

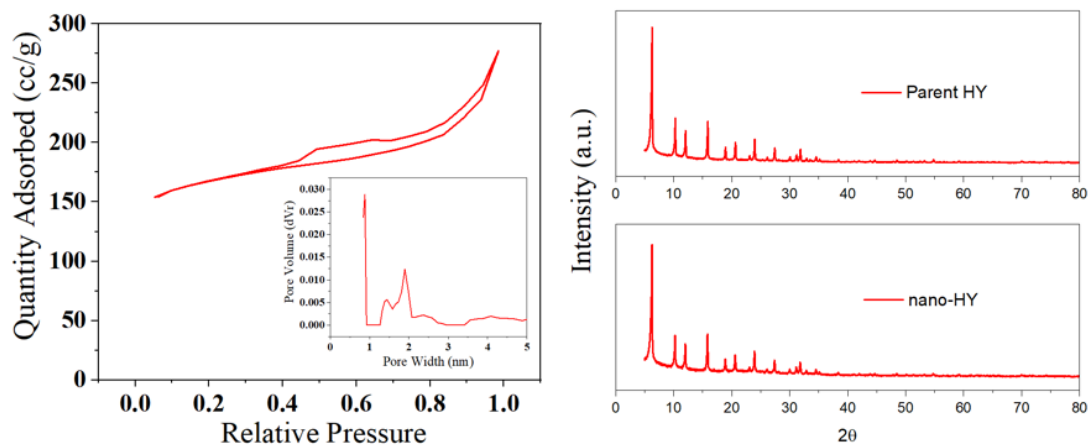

**Figure S4:** Left: Nitrogen adsorption isotherm and pores size distribution of nanozeolites. Right: Comparison of XRD patterns of nanozeolite and parent zeolite.

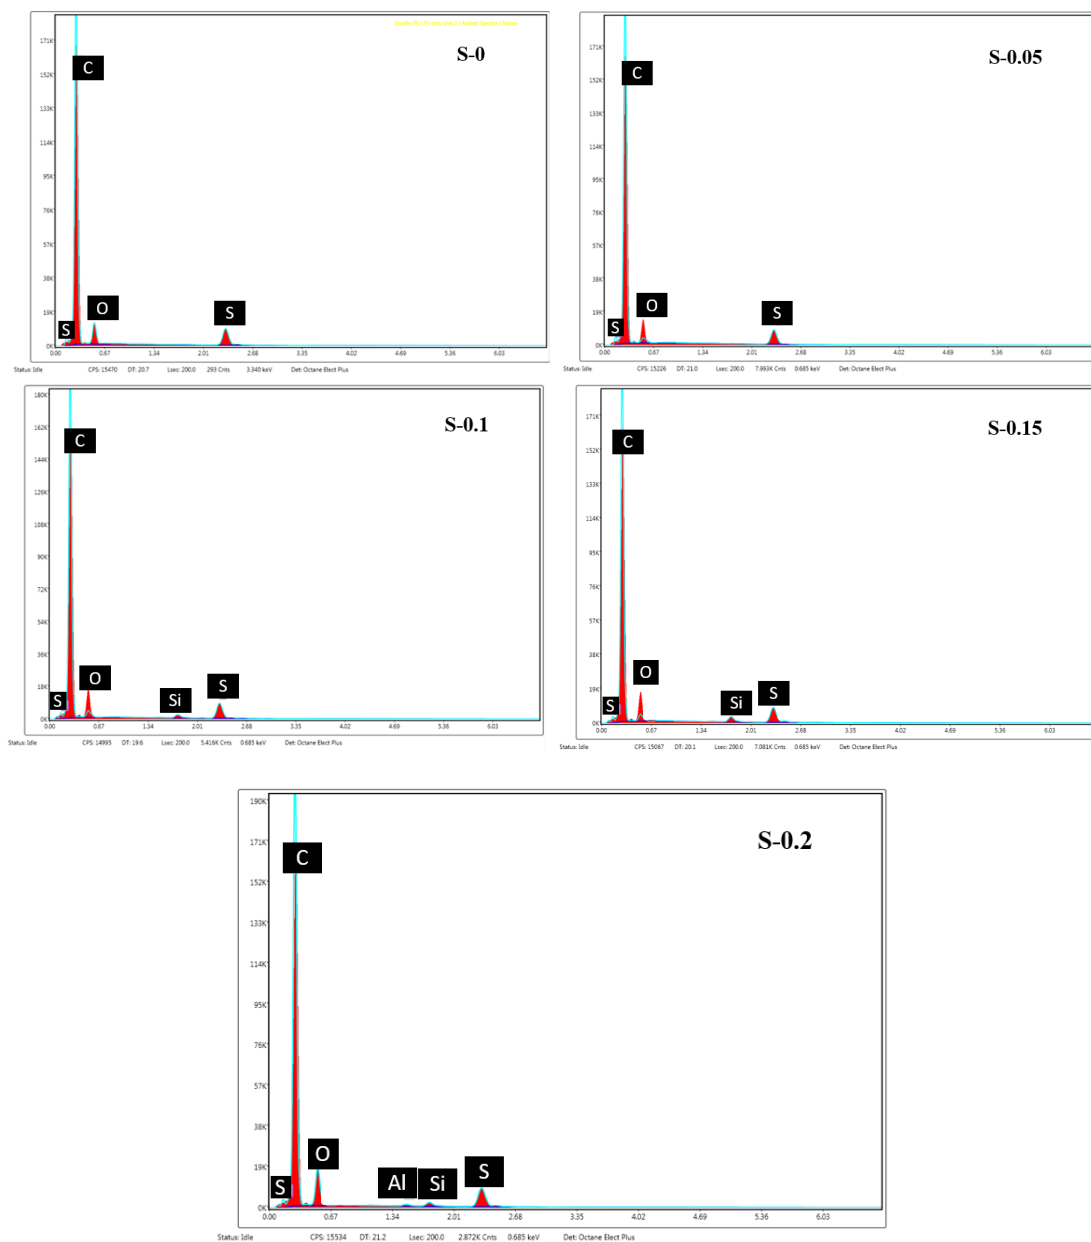

**Figure S5:** EDS spectrum of all the supports fabricated with varying nanozeolite concentrations.

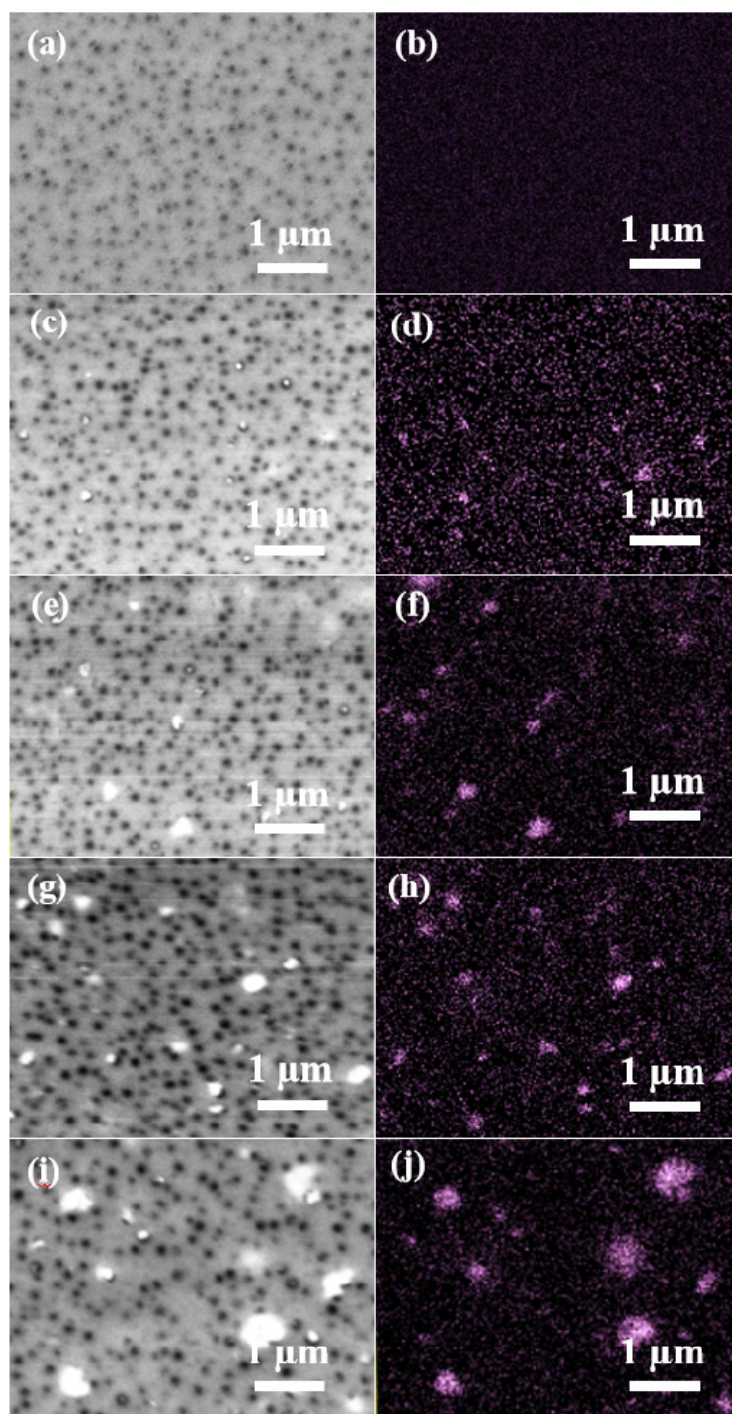

**Figure S6:** Elemental mapping of Si atom distribution on the surface of membrane supports prepared with varying nanozeolite concentration (a,b) S-0, (c,d) S-0.05, (e,f) S-0.1, (g,h) S-0.15 and (i,j) S-0.2

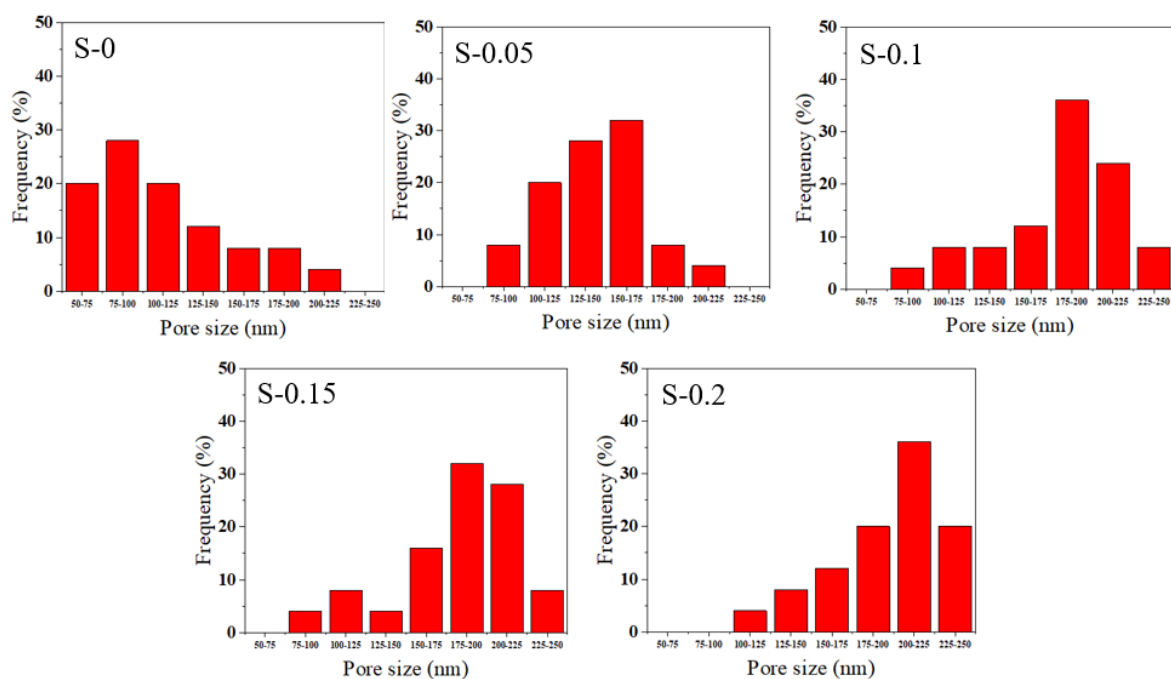

**Figure S7:** Pores size distribution of membrane supports as observed from SEM images.

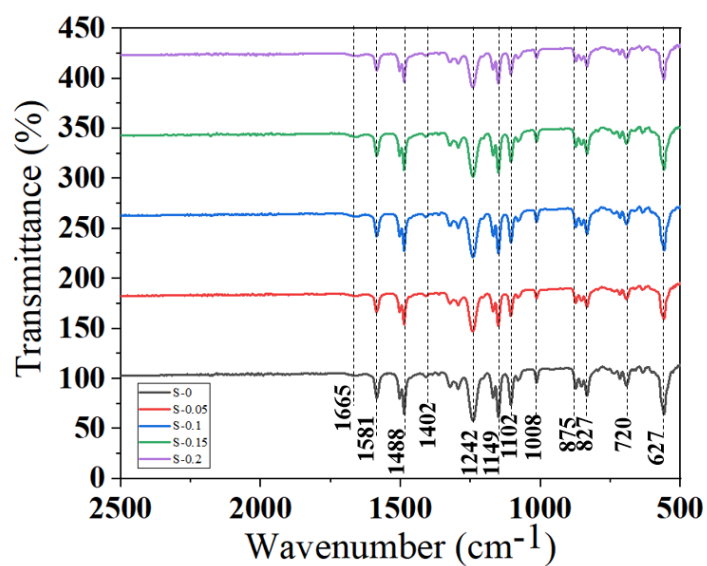

**Figure S8:** FTIR spectra of all membrane supports.

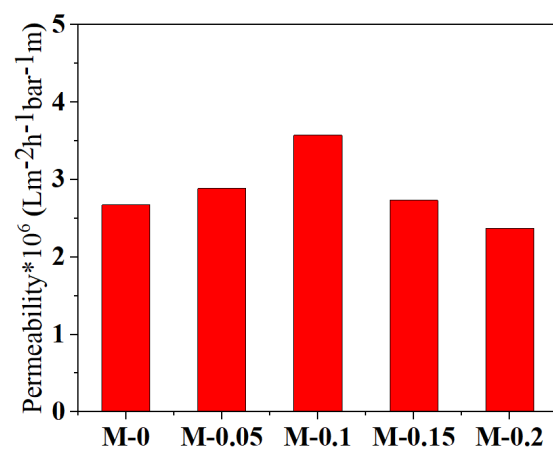

**Figure S9:** Permeabilities of different PA membranes.

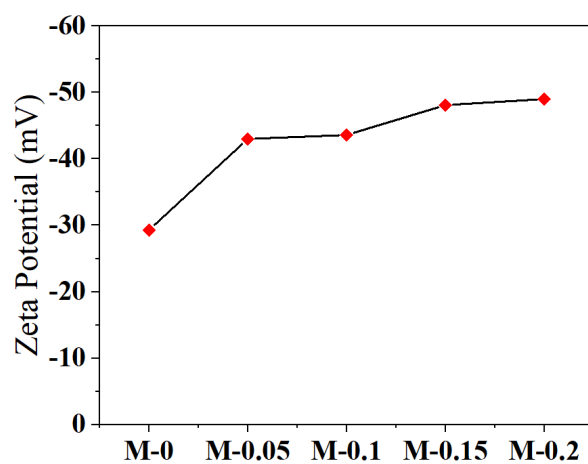

**Figure S10:** Zeta potential of PA membranes at neutral pH.
